# Supplementary material for: Comparative Genomics Integrated with Association Analysis Identifies Candidate Effector Genes Corresponding to Lr20 in Phenotype-Paired Puccinia triticina Isolates from Australia
Source: Front Plant Sci. 2017 Feb 9;8:148. doi: 10.3389/fpls.2017.00148 (PMC5298990; doi:10.3389/fpls.2017.00148)
Supplement: Supplementary file 5 [file DataSheet5.XLSX]

## Sheet: Sheet1
Additional file 5: Predicted amino acid changes introduced by non-synonymous mutations in the 20 candidates and the changes in the amino acid characteristics
candidate gene	supercontig_ID	base position	transcript orientation	location in CD	position in codon	codon	amino acid change	amino acid change	amino acid characteristic change
PTTG_25257	supercont2.2	1370548	trans_orient:+	loc_in_cds:25	codon_pos:1	codon:Ggt-Cgt	pep:G->R	Gly-9-Arg	Unique->Electricaly Charged Basic*
PTTG_25257	supercont2.2	1370893	trans_orient:+	loc_in_cds:255	codon_pos:3	codon:caA-caC	pep:Q->H	Gln-85-His	Polar Neutral->Electricaly Charged Basic*
PTTG_25257	supercont2.2	1370939	trans_orient:+	loc_in_cds:301	codon_pos:1	codon:Gtg-Ttg	pep:V->L	Val-101-Leu	Hydrophobic Aliphatic->Hydrophobic Aliphatic
PTTG_25257	supercont2.2	1370942	trans_orient:+	loc_in_cds:304	codon_pos:1	codon:Act-Ccg	pep:T->P	Thr-102-Pro	Polar Neutral->Unique*
PTTG_25257	supercont2.2	1370944	trans_orient:+	loc_in_cds:306	codon_pos:3	codon:acT-ccG	pep:T->P	Thr-102-Pro	Polar Neutral->Unique*
PTTG_03866	supercont2.32	425737	trans_orient:-	loc_in_cds:996	codon_pos:3	codon:atC-atG	pep:I->M	Ile-332-Met	Hydrophobic Aliphatic->Polar Neutral*
PTTG_03866	supercont2.32	427402	trans_orient:-	loc_in_cds:80	codon_pos:2	codon:aAa-aGa	pep:K->R	Lys-27-Arg	Electricaly Charged Basic->Electricaly Charged Basic
PTTG_03866	supercont2.32	427454	trans_orient:-	loc_in_cds:28	codon_pos:1	codon:Ctc-Ttc	pep:L->F	Leu-10-Phe	Hydrophobic Aliphatic->Hydrophobic Aromatic*
PTTG_03866	supercont2.32	427461	trans_orient:-	loc_in_cds:21	codon_pos:3	codon:tgG-tgC	pep:W->C	Trp-7-Cys	Hydrophobic Aromatic->Polar Neutral*
PTTG_03824	supercont2.2956	110	trans_orient:+	loc_in_cds:52	codon_pos:1	codon:Aag-Cag	pep:K->Q	Lys-18-Gln	Electricaly Charged Basic->Polar Neutral*
PTTG_03824	supercont2.2956	492	trans_orient:+	loc_in_cds:344	codon_pos:2	codon:cGa-cAa	pep:R->Q	Arg-115-Gln	Electricaly Charged Basic->Polar Neutral*
PTTG_03824	supercont2.2956	1310	trans_orient:+	loc_in_cds:1162	codon_pos:1	codon:Cgc-Tgc	pep:R->C	Arg-388-Cys	Electricaly Charged Basic->Polar Neutral*
PTTG_30778	supercont2.6810	451	trans_orient:-	loc_in_cds:422	codon_pos:2	codon:cGa-cAa	pep:R->Q	Arg-141-Gln	Electricaly Charged Basic->Polar Neutral*
PTTG_30778	supercont2.6810	530	trans_orient:-	loc_in_cds:343	codon_pos:1	codon:Gag-Aag	pep:E->K	Glu-115-Lys	Electricaly Charged Acidic->Electricaly Charged Basic*
PTTG_30778	supercont2.6810	611	trans_orient:-	loc_in_cds:262	codon_pos:1	codon:Cgc-Tgc	pep:R->C	Arg-88-Cys	Electricaly Charged Basic->Polar Neutral*
PTTG_30778	supercont2.6810	620	trans_orient:-	loc_in_cds:253	codon_pos:1	codon:Gaa-Aaa	pep:E->K	Glu-85-Lys	Electricaly Charged Acidic->Electricaly Charged Basic*
PTTG_30778	supercont2.6810	653	trans_orient:-	loc_in_cds:220	codon_pos:1	codon:Gaa-Aaa	pep:E->K	Glu-74-Lys	Electricaly Charged Acidic->Electricaly Charged Basic*
PTTG_30778	supercont2.6810	670	trans_orient:-	loc_in_cds:203	codon_pos:2	codon:cGa-cTa	pep:R->L	Arg-68-Leu	Electricaly Charged Basic->Hydrophobic Aliphatic*
PTTG_30778	supercont2.6810	707	trans_orient:-	loc_in_cds:166	codon_pos:1	codon:Agc-Ggc	pep:S->G	Ser-56-Gly	Polar Neutral->Unique*
PTTG_30778	supercont2.6810	822	trans_orient:-	loc_in_cds:51	codon_pos:3	codon:caA-cgC	pep:Q->R	Gln-17-Arg	Polar Neutral->Electricaly Charged Basic*
PTTG_30778	supercont2.6810	823	trans_orient:-	loc_in_cds:50	codon_pos:2	codon:cAa-cGc	pep:Q->R	Gln-17-Arg	Polar Neutral->Electricaly Charged Basic*
PTTG_03715	supercont2.68	411163	trans_orient:-	loc_in_cds:1349	codon_pos:2	codon:gGc-gTc	pep:G->V	Gly-450-Val	Unique->Hydrophobic Aliphatic*
PTTG_03715	supercont2.68	411165	trans_orient:-	loc_in_cds:1347	codon_pos:3	codon:gtG-ttC	pep:V->F	Val-449-Phe	Hydrophobic Aliphatic->Hydrophobic Aromatic*
PTTG_03715	supercont2.68	411167	trans_orient:-	loc_in_cds:1345	codon_pos:1	codon:Gtg-Ttc	pep:V->F	Val-449-Phe	Hydrophobic Aliphatic->Hydrophobic Aromatic*
PTTG_03715	supercont2.68	411763	trans_orient:-	loc_in_cds:914	codon_pos:2	codon:gCt-gTt	pep:A->V	Ala-305-Val	Hydrophobic Aliphatic->Hydrophobic Aliphatic
PTTG_11639	supercont2.6	869981	trans_orient:-	loc_in_cds:493	codon_pos:1	codon:Ctt-Att	pep:L->I	Leu-165-Ile	Hydrophobic Aliphatic->Hydrophobic Aliphatic
PTTG_11639	supercont2.6	870331	trans_orient:-	loc_in_cds:143	codon_pos:2	codon:gTt-gCt	pep:V->A	Val-48-Ala	Hydrophobic Aliphatic->Hydrophobic Aliphatic
PTTG_01476	supercont2.1	295611	trans_orient:+	loc_in_cds:115	codon_pos:1	codon:Tgc-Cgc	pep:C->R	Cys-39-Arg	Polar Neutral->Electricaly Charged Basic*
PTTG_01476	supercont2.1	296460	trans_orient:+	loc_in_cds:376	codon_pos:1	codon:Gtc-Ctc	pep:V->L	Val-126-Leu	Hydrophobic Aliphatic->Hydrophobic Aliphatic
PTTG_01476	supercont2.1	297348	trans_orient:+	loc_in_cds:1118	codon_pos:2	codon:tAc-tGc	pep:Y->C	Tyr-373-Cys	Hydrophobic Aromatic->Polar Neutral*
PTTG_01476	supercont2.1	297579	trans_orient:+	loc_in_cds:1349	codon_pos:2	codon:cGc-cAc	pep:R->H	Arg-450-His	Electricaly Charged Basic->Electricaly Charged Basic
PTTG_01476	supercont2.1	297641	trans_orient:+	loc_in_cds:1411	codon_pos:1	codon:Ctc-Ttc	pep:L->F	Leu-471-Phe	Hydrophobic Aliphatic->Hydrophobic Aromatic*
PTTG_06625	supercont2.18	464460	trans_orient:+	loc_in_cds:130	codon_pos:1	codon:Cac-Gac	pep:H->D	His-44-Asp	Electricaly Charged Basic->Electricaly Charged Acidic*
PTTG_06625	supercont2.18	465608	trans_orient:+	loc_in_cds:1255	codon_pos:1	codon:Act-Ccg	pep:T->P	Thr-419-Pro	Polar Neutral->Unique*
PTTG_06625	supercont2.18	465610	trans_orient:+	loc_in_cds:1257	codon_pos:3	codon:acT-ccG	pep:T->P	Thr-419-Pro	Polar Neutral->Unique*
PTTG_06324	supercont2.48	111388	trans_orient:+	loc_in_cds:656	codon_pos:2	codon:gTc-gGc	pep:V->G	Val-219-Gly	Hydrophobic Aliphatic->Unique*
PTTG_29130	supercont2.205	39610	trans_orient:+	loc_in_cds:47	codon_pos:2	codon:tTg-tCg	pep:L->S	Leu-16-Ser	Hydrophobic Aliphatic->Polar Neutral*
PTTG_29130	supercont2.205	39639	trans_orient:+	loc_in_cds:76	codon_pos:1	codon:Gtt-Att	pep:V->I	Val-26-Ile	Hydrophobic Aliphatic->Hydrophobic Aliphatic
PTTG_29130	supercont2.205	39654	trans_orient:+	loc_in_cds:91	codon_pos:1	codon:Cgc-Tgc	pep:R->C	Arg-31-Cys	Electricaly Charged Basic->Polar Neutral*
PTTG_29130	supercont2.205	39657	trans_orient:+	loc_in_cds:94	codon_pos:1	codon:Gat-Aat	pep:D->N	Asp-32-Asn	Electricaly Charged Acidic->Polar Neutral*
PTTG_29130	supercont2.205	39696	trans_orient:+	loc_in_cds:133	codon_pos:1	codon:Gac-Aac	pep:D->N	Asp-45-Asn	Electricaly Charged Acidic->Polar Neutral*
PTTG_29130	supercont2.205	39751	trans_orient:+	loc_in_cds:188	codon_pos:2	codon:tCg-tTg	pep:S->L	Ser-63-Leu	Polar Neutral->Hydrophobic Aliphatic*
PTTG_29130	supercont2.205	39759	trans_orient:+	loc_in_cds:196	codon_pos:1	codon:Cgt-Tgt	pep:R->C	Arg-66-Cys	Electricaly Charged Basic->Polar Neutral*
PTTG_29130	supercont2.205	39774	trans_orient:+	loc_in_cds:211	codon_pos:1	codon:Gcc-Acc	pep:A->T	Ala-71-Thr	Hydrophobic Aliphatic->Polar Neutral*
PTTG_29130	supercont2.205	39790	trans_orient:+	loc_in_cds:227	codon_pos:2	codon:cTa-cCa	pep:L->P	Leu-76-Pro	Hydrophobic Aliphatic->Unique*
PTTG_29130	supercont2.205	39823	trans_orient:+	loc_in_cds:260	codon_pos:2	codon:tTg-tCg	pep:L->S	Leu-87-Ser	Hydrophobic Aliphatic->Polar Neutral*
PTTG_29130	supercont2.205	39903	trans_orient:+	loc_in_cds:340	codon_pos:1	codon:Tgg-Cgg	pep:W->R	Trp-114-Arg	Hydrophobic Aromatic->Electricaly Charged Basic*
PTTG_29130	supercont2.205	39933	trans_orient:+	loc_in_cds:370	codon_pos:1	codon:Gag-Aag	pep:E->K	Glu-124-Lys	Electricaly Charged Acidic->Electricaly Charged Basic*
PTTG_29130	supercont2.205	39969	trans_orient:+	loc_in_cds:406	codon_pos:1	codon:Gaa-Aaa	pep:E->K	Glu-136-Lys	Electricaly Charged Acidic->Electricaly Charged Basic*
PTTG_29130	supercont2.205	39993	trans_orient:+	loc_in_cds:430	codon_pos:1	codon:Gac-Aac	pep:D->N	Asp-144-Asn	Electricaly Charged Acidic->Polar Neutral*
PTTG_29130	supercont2.205	40032	trans_orient:+	loc_in_cds:469	codon_pos:1	codon:Tgg-Cgg	pep:W->R	Trp-157-Arg	Hydrophobic Aromatic->Electricaly Charged Basic*
PTTG_29130	supercont2.205	40047	trans_orient:+	loc_in_cds:484	codon_pos:1	codon:Aat-Gat	pep:N->D	Asn-162-Asp	Polar Neutral->Electricaly Charged Acidic*
PTTG_29130	supercont2.205	40099	trans_orient:+	loc_in_cds:536	codon_pos:2	codon:tCg-tTg	pep:S->L	Ser-179-Leu	Polar Neutral->Hydrophobic Aliphatic*
PTTG_29130	supercont2.205	40172	trans_orient:+	loc_in_cds:577	codon_pos:1	codon:Aac-Gac	pep:N->D	Asn-193-Asp	Polar Neutral->Electricaly Charged Acidic*
PTTG_29130	supercont2.205	40317	trans_orient:+	loc_in_cds:722	codon_pos:2	codon:cCg-cTg	pep:P->L	Pro-241-Leu	Unique->Hydrophobic Aliphatic*
PTTG_29130	supercont2.205	40359	trans_orient:+	loc_in_cds:764	codon_pos:2	codon:aCc-aTc	pep:T->I	Thr-255-Ile	Polar Neutral->Hydrophobic Aliphatic*
PTTG_29130	supercont2.205	40415	trans_orient:+	loc_in_cds:820	codon_pos:1	codon:Gac-Aac	pep:D->N	Asp-274-Asn	Electricaly Charged Acidic->Polar Neutral*
PTTG_29551	supercont2.567	1241	trans_orient:+	loc_in_cds:77	codon_pos:2	codon:cGa-cAa	pep:R->Q	Arg-26-Gln	Electricaly Charged Basic->Polar Neutral*
PTTG_09239	supercont2.567	6543	trans_orient:-	loc_in_cds:370	codon_pos:1	codon:Ccg-Tcg	pep:P->S	Pro-124-Ser	Unique->Polar Neutral*
PTTG_29866	supercont2.1058	5141	trans_orient:+	loc_in_cds:1168	codon_pos:1	codon:Ggc-Agc	pep:G->S	Gly-390-Ser	Unique->Polar Neutral*
PTTG_29866	supercont2.1058	5169	trans_orient:+	loc_in_cds:1196	codon_pos:2	codon:tTg-tCg	pep:L->S	Leu-399-Ser	Hydrophobic Aliphatic->Polar Neutral*
PTTG_29866	supercont2.1058	5174	trans_orient:+	loc_in_cds:1201	codon_pos:1	codon:Tct-Act	pep:S->T	Ser-401-Thr	Polar Neutral->Polar Neutral
PTTG_30373	supercont2.3202	316	trans_orient:-	loc_in_cds:1246	codon_pos:1	codon:Gtt-Ttt	pep:V->F	Val-416-Phe	Hydrophobic Aliphatic->Hydrophobic Aromatic*
PTTG_30373	supercont2.3202	492	trans_orient:-	loc_in_cds:1132	codon_pos:1	codon:Aaa-Gaa	pep:K->E	Lys-378-Glu	Electricaly Charged Basic->Electricaly Charged Acidic*
PTTG_30373	supercont2.3202	549	trans_orient:-	loc_in_cds:1075	codon_pos:1	codon:Cgg-Tgg	pep:R->W	Arg-359-Trp	Electricaly Charged Basic->Hydrophobic Aromatic*
PTTG_30373	supercont2.3202	552	trans_orient:-	loc_in_cds:1072	codon_pos:1	codon:Tgt-Cgt	pep:C->R	Cys-358-Arg	Polar Neutral->Electricaly Charged Basic*
PTTG_30373	supercont2.3202	628	trans_orient:-	loc_in_cds:996	codon_pos:3	codon:gaA-gaC	pep:E->D	Glu-332-Asp	Electricaly Charged Acidic->Electricaly Charged Acidic
PTTG_30373	supercont2.3202	798	trans_orient:-	loc_in_cds:895	codon_pos:1	codon:Ctc-Ttc	pep:L->F	Leu-299-Phe	Hydrophobic Aliphatic->Hydrophobic Aromatic*
PTTG_30373	supercont2.3202	816	trans_orient:-	loc_in_cds:877	codon_pos:1	codon:Gat-Aat	pep:D->N	Asp-293-Asn	Electricaly Charged Acidic->Polar Neutral*
PTTG_30373	supercont2.3202	864	trans_orient:-	loc_in_cds:829	codon_pos:1	codon:Tgt-Cgt	pep:C->R	Cys-277-Arg	Polar Neutral->Electricaly Charged Basic*
PTTG_30373	supercont2.3202	1032	trans_orient:-	loc_in_cds:661	codon_pos:1	codon:Gat-Aat	pep:D->N	Asp-221-Asn	Electricaly Charged Acidic->Polar Neutral*
PTTG_30373	supercont2.3202	1114	trans_orient:-	loc_in_cds:637	codon_pos:1	codon:Gtc-Ttc	pep:V->F	Val-213-Phe	Hydrophobic Aliphatic->Hydrophobic Aromatic*
PTTG_30373	supercont2.3202	1147	trans_orient:-	loc_in_cds:604	codon_pos:1	codon:Ctt-Att	pep:L->I	Leu-202-Ile	Hydrophobic Aliphatic->Hydrophobic Aliphatic
PTTG_30373	supercont2.3202	1197	trans_orient:-	loc_in_cds:554	codon_pos:2	codon:tCg-tTg	pep:S->L	Ser-185-Leu	Polar Neutral->Hydrophobic Aliphatic*
PTTG_30373	supercont2.3202	1321	trans_orient:-	loc_in_cds:488	codon_pos:2	codon:cAa-cGa	pep:Q->R	Gln-163-Arg	Polar Neutral->Electricaly Charged Basic*
PTTG_30373	supercont2.3202	1340	trans_orient:-	loc_in_cds:469	codon_pos:1	codon:Ctt-Att	pep:L->I	Leu-157-Ile	Hydrophobic Aliphatic->Hydrophobic Aliphatic
PTTG_30373	supercont2.3202	1603	trans_orient:-	loc_in_cds:260	codon_pos:2	codon:cGa-cAa	pep:R->Q	Arg-87-Gln	Electricaly Charged Basic->Polar Neutral*
PTTG_30373	supercont2.3202	1645	trans_orient:-	loc_in_cds:218	codon_pos:2	codon:aAa-gGa	pep:K->G	Lys-73-Gly	Electricaly Charged Basic->Unique*
PTTG_30373	supercont2.3202	1646	trans_orient:-	loc_in_cds:217	codon_pos:1	codon:Aaa-Gga	pep:K->G	Lys-73-Gly	Electricaly Charged Basic->Unique*
PTTG_26540	supercont2.25	646363	trans_orient:-	loc_in_cds:1418	codon_pos:2	codon:tCc-tTc	pep:S->F	Ser-473-Phe	Polar Neutral->Hydrophobic Aromatic*
PTTG_08794	supercont2.70	503523	trans_orient:-	loc_in_cds:305	codon_pos:2	codon:gAc-gGc	pep:D->G	Asp-102-Gly	Electricaly Charged Acidic->Unique*
PTTG_25496	supercont2.5	166979	trans_orient:-	loc_in_cds:383	codon_pos:2	codon:cGa-cAa	pep:R->Q	Arg-128-Gln	Electricaly Charged Basic->Polar Neutral*
PTTG_06325	supercont2.48	99185	trans_orient:+	loc_in_cds:505	codon_pos:1	codon:Atc-Gtc	pep:I->V	Ile-169-Val	Hydrophobic Aliphatic->Hydrophobic Aliphatic
PTTG_06325	supercont2.48	99541	trans_orient:+	loc_in_cds:800	codon_pos:2	codon:gTc-gCc	pep:V->A	Val-267-Ala	Hydrophobic Aliphatic->Hydrophobic Aliphatic
* indicates the changes with altered amino acid characteristics
